# Supplementary material
Source: Royal Society of Chemistry journal article supplement (https://www.rsc.org/suppdata/dt/1999/1049/809944h.doc)
Supplement: Supplementary file 1 [file 809944h.doc]

Table 1. Analytical and spectroscopic data

| Compound and analysis*a* | Spectroscopic data*b* | |
| --- | --- | --- |
|  |  | |
| [{(C5H4)(4-But-  cyclohexyl)(C9H6)}Li2]  White pyrophoric | 1H*e*: 7.89 [1 H, m, Hc or f], 7.21 [1 H, m, Hc or f], 6.56 [1 H, d, J(HH) 3, Ha], 6.33 [2 H, m, Hd and e], 5.74 [2 H, pseudo q, J(HH) 3, C5H4] 5.70 [1 H, d, J(HH) 3, Hb], 5.50 [2 H, pseudo q, J(HH) 3, C5H4],  3.60 [2 H, s, cyclohexyl], 3.22 [1 H, d, cyclohexyl],  1.75 [3 H, m, cyclohexyl], 1.62 [2 H, m, cyclohexyl], 1.31 [1 H, s, C*H*But], 0.62 [9 H, s, But] | |
|  |  | |
| [Zr(-C5H5)Cl2{-(-C5H4)  CMe2(-C9H6)}Rh(CO)2] (**1**)  Yellow-orange  C, 47.5 (47.5)  H, 3.6 (3.5)  Cl, 11.9 (11.7) | see ref 14  Labelling scheme used for assignments given below. | |
| [Zr(-C5H5)Cl2{-(-C5H4)(4-But-cyclohexyl)C(-C9H6)}Rh(CO)2] (**2**)  Orange  C, 53.3 (53.0)  H, 4.8 (4.7)  Cl, 9.7 (10.1) | 1H*d* 500 MHz: 7.87 [1 H, d, Hc or f], 7.35 [1 H, d, Hc or f], 7.28 [1 H, t, J(HH) 8, Hd or e],  7.19 [1 H, t, J(HH) 8, Hd or e], 6.77 [1 H, pseudo q, J(HH) 3, C5H4], 6.66 [1 H, pseudo q, J(HH) 3, C5H4], 6.61 [1 H, pseudo q, J(HH) 3, C5H4],  6.31 [1 H, d, J(RhH) = J(HH) 2.5, Ha], 6.11 [1 H, pseudo q, J(HH) 3, C5H4], 5.88 [5 H, s, C5H5], 5.72 [1H, d, J(HH) 2.5, Hb], 3.15 [1 H, dq, cyclohexyl], 3.02 [1 H, dq, cyclohexyl], 2.31 [1 H, td, cyclohexyl], 2.18 [1 H, td, cyclohexyl], 1.85 [1 H, m, cyclohexyl], 1.75 [1 H, m, cyclohexyl], 1.55 [1 H, qd, cyclohexyl], 1.15 [1 H, tt, C*H*But], 0.95 [1 H, qd, cyclohexyl], 0.84 [9 H, s, But], 13C{1H}*d*(125.7 MHz: 190.3 [d, J(RhC) 85, CO], 139.2 [s, Cipso C5H4], 125.6 [s, Cd or e], 124.8 [s, Cd or e], 121.0 [s, Cc or f], 120.4 [s, C5H4], 120.3 [s, Cc or f], 118.8 [s, C5H4], 117.0 [s, Cg,h or i], 116.9 [s, Cg,h or i], 116.5 [s, C5H5], 115.3 [s, Cg,h or i], 115.2 [s, C5H4], 110.1 [s, C5H4], 100.1 [d, J(RhC) 8, Ca],  71.2 [s, Cb], 47.2 [s, *C*HBut], 44.7 [s, Cyclohexyl],  41.4 [s, Cbridgehead], 39.0 [s, Cyclohexyl],  32.6 [s, *C*(CH3)3], 27.5 [s, C(*C*H3)3],  25.0 [s, Cyclohexyl], 24.1 [s, Cyclohexyl],  Selected IR Data: (CsI disc): 2037 (s), 1978 (s) | |
| [Hf(-C5H5)Cl2{-(-C5H4)CMe2(-C9H6)}Rh(CO)2] (**3**)  Yellow  C, 41.5 (41.6)  H, 3.0 (3.1)  Cl, 10.4 (10.2) | 1H*d*: 7.34 [1H, m, Hc or f], 7.25 [1H, m, Hc or f], 7.11 [2H, m, Hd and e], 6.58 [1H, pseudo q, C5H4], 6.42 [1H, pseudo q, C5H4], 6.36 [1H, pseudo q, C5H4, partially obscured], 6.35 [5H, s, C5H5], 6.10 [1H, pseudo q, C5H4], 5.72 [1H, t, J(HH) = J(RhH) 3, Ha], 5.59 [1H, d, J(HH) 3, Hb], 2.08 [3H, s, Me]  1.95 [3H, s, Me]  13C{1H}*d*,: 190.3 [d, J(RhC) 83, CO], 137.8 [s, Cipso], 125.0 [s, Cd or e], 124.6 [s, Cd or e], 119.9 [s, Cc or f], 119.5 [s, Cc or f], 117.6 [s, Cg, h or i],  116.9 [s, C5H4], 116.7 [s, Cg, h or i], 115.4 [s, C5H4], 115.0 [s, C5H5], 113.8 [s, C5H4], 113.6 [s, Cg, h or i], 108.9 [s, C5H4], 97.8 [d, J(RhC) 6, Ca], 71.0 [s, Cb], 37.5 [s, *C*Me2], 30.6 [s, Me], 30.3 [s, Me]  Selected IR data: (CsI disc) (CO) 2037 (s), 1976 (s) | |
| [Zr(-C5H5)Cl2{-(-C5H4)CMe2(-C5H4)}Rh(CO)2] (**4**)  Orange  C, 43.6 (43.2)  H, 3.7 (3.4)  Cl, 13.2 (12.7) | 1H*d*: 6.50 [2H, pseudo t, J(HH) 3, C5H4 Zr],  6.40 [5H, s, C5H5], 6.37 [2H, pseudo t, J(HH) 3, C5H4 Zr], 5.38 [2H, m, C5H4 Rh], 5.37 [2H, m, C5H4 Rh], 1.65 [6H, s, Me]  1H*c*: 6.05 [2H, pseudo t, J(HH) 3, C5H4 Zr],  5.88 [5H, s, C5H5], 5.70 [2H, pseudo t, J(HH) 3, C5H4 Zr], 4.87 [2H, m, C5H4 Rh], 4.77 [2H, m, C5H4 Rh], 1.55 [6H, s, Me],  13C{1H}*c*: 192.7 [d, J(RhC) 85, CO], 140.2 [s, Cipso Zr], 116.0 [s, C5H4 Zr and C5H5],  114.3 [s, Cipso Rh], 112.8 [s, C5H4 Zr],  86.2 [s, C5H4 Rh], 86.1 [s, C5H4 Rh],  36.0 [s, *C*Me2], 31.0 [s, Me]  Selected IR data: (CsI disc) (CO) 2025 (s), 1969 (s) | |
| [Hf(-C5H5)(NCS)2{-(-C5H4)CMe2  (-C9H6)}Rh(CO)2] (**5**)  Orange  C, 44.1 (42.3)  H, 3.1 (2.9);  N, 3.4 (3.8) | 1H*d*: 7.31 [1H, m, Hc or f],  7.24 [1H, m, Hc or f], 7.12 [2H, m, Hd and e],  6.57 [1H, pseudo q, C5H4],  6.40 [1H, pseudo q, C5H4, partially obscured],  6.37 [5H, s, C5H5], 6.22 [1H, pseudo q, C5H4],  6.19 [1H, pseudo q, C5H4], 5.77 [1H, t, J(HH) = J(RhH) 3, Ha], 5.62 [1H, d, J(HH) 3, Hb], 2.04 [3H, s, Me], 1.90 [3H, s, Me]  13C{1H}*d* 125.7 MHz: 193.0 [d, J(RhC) 88, CO]  141.6 [s, Cipso], 130.8 [s, NCS]  130.0 [s, NCS], 126.7 [s, Cd or e]  126.2 [s, Cd or e], 121.5 [s, Cc or f]  120.7 [s, Cc or f], 119.1 [s, Cg, h or i]  118.0 [s, Cg, h or i], 116.7 [s, C5H4]  115.4 [s, C5H4], 115.2 [s, C5H5]  114.3 [s, Cg, h or i], 110.3 [s, C5H4]  107.6 [s, C5H4], 98.7 [d, J(RhC) 6, Ca]  71.8 [s, Cb], 37.2 [s, *C*Me2]  30.4 [s, Me], 30.3 [s, Me]  Selected IR data: (CsI disc) (CO) 2040 (s), 2002 (s), 1974 (s) | |
| [Hf(-C5H5)Cl2{-(-C5H4)  CMe2(-C9H6)}Rh(CO)I2] (**6**)  Black  C, 29.2 (30.0)  H, 2.0 (2.3) | 1H*d*: 7.74 [1H, d, J(HH) 8 Hc or f]  7.56 [1H, t, J(HH) 8, Hd or e]  7.50 [1H, d, J(HH) 8, Hc or f]  7.46 [1H, t, J(HH) 8, Hd or e]  6.59 [1H, pseudo q, C5H4]  6.45 [1H, pseudo q, C5H4]  6.41 [5H, s, C5H5], 6.37 [2H, m, Ha and C5H4]  6.26 [1H, pseudo q, C5H4]  5.72 [1H, d, J(HH) 3, Hb], 2.13 [3H, s, Me]  2.10 [3H, s, Me]  3C{1H}*d*125.7 MHz CO and quaternary carbons  not observed, 133.7 [s, Cd or e], 132.0 [s, Cd or e]  129.3 [s, Cc or f], 125.4 [s, Cc or f]  117.3 [s, C5H4], 116.2 [s, C5H4]  115.3 [s, C5H5], 111.9 [s, C5H4]  110.0 [s, C5H4], 90.8 [d, J(RhC) 4, Cb]  83.3 [s, Ca], 31.0 [s, Me], 29.8 [s, Me]  Selected IR data: (CsI disc) (CO) 2063 (s) | |
| [Zr(-C5H5Cl2{-(-C5H4)CMe2  (-C9H6)}Rh(PPh3)2] (**7**)  Orange  C, 64.3 (64.9)  H, 4.6 (4.7)  Cl, 6.9 (6.6) | 1H*c*: 7.46 [1H, partially obscured, Hc or f]  7.43 [12H, m, PPh3], 7.02 [1H, t, Hd or e]  6.95 [18H, m, PPh3], 6.81 [1H, t, J(HH) 8, Hd or e]  6.21 [1H, d, J(HH) 8, Hc or f], 6.46 [1H, pseudo q, C5H4]  6.45 [1H, pseudo q, C5H4], 6.02 [1H, pseudo q, C5H4]  5.96 [1H, t, J(RhH) = J(HH) 2.5, Ha], 5.84 [5H, s, C5H5]  5.54 [1H, pseudo q, C5H4], 4.25 [1H, d, J(HH) 2.5, Hb]  2.21 [3H, s, Me], 2.18 [3H, s, Me]  13C{1H}ic 125.7 MHz: 141.2 [s, Cipso C5H4]  123.1 [s, Cd or e]. 122.7 [s, Cd or e]  118.8 [s, Cc or f], 118.3 [s, Cc or f]  117.3 [s, C5H4], 116.8 [s, 2xC5H4]  116.2 [s, C5H4], 116.0 [s, C5H5]  110.5 [s, C5H4], 98.4 [m, Ca]  76.7 [m, Cb], 31.8 [s, Me], 31.2 [s, Me]  31P{1H} 200 MHz, C6D6: 47.5 [d, J(RhP) 200] | |
| [Zr(-C5H5)Cl2{-(-C5H4)  CMe2(-C9H6)}Mn(CO)3] (**8**)  Yellow  C, 50.7 (51.2)  H, 3.6 (3.6)  Cl, 12.8 (12.1) | see ref 14. | |
| [Hf(-C5H5)Cl2{-(-C5H4)  CMe2(-C9H6)}Mn(CO)3] (**9**)  Yellow  C, 44.2 (44.6)  H, 3.1 (3.1)  Cl, 10.6 (10.5) | 1H*d*: 7.49 [1H, d, J(HH) 9, Hc or f]  7.45 [1H, d, J(HH) 9, Hc or f], 7.12 [1H, t, J(HH) 8, Hd or e]  7.06 [1H, t, J(HH) 8, Hd or e], 6.60 [1H, m, C5H4]  6.49 [1H, m, C5H4], 6.37 [1H, m, C5H4 partially obscured]  6.36 [5H, s, C5H5], 6.20 [1H, m, C5H4]  5.13 [1H, d, J(HH) 3, Ha], 4.85 [1H, d, J(HH) 3,Hb]  2.07 [3H, s, Me], 1.94 [3H, s, Me]  13C{1H}id 125.7 MHz: CO not observed  139.0 [s, Cipso], 127.6 [s, Cd or e], 127.4 [s, Cd or e]  125.8 [s, Cc or f], 124.3 [s, Cc or f], 116.5 [s, C5H4]  115.8 [s, C5H4], 115.1 [s, C5H5], 112.7 [s, C5H4]  110.4 [s, C5H4], 105.6 [s, Cg, h or i], 104.3 [s, Cg, h or i]  102.0 [s, Cg, h or i], 89.3 [s, Ca], 69.9 [s, Cb]  37.2 [s, *C*Me2], 30.8 [s, Me], 30.1 [s, Me]  Selected IR data: (CsI disc) (CO) 2014 (s), 1936 (s), 1920 (s) | |
| [Zr(-C5H5)Cl2{-(-C5H4)  CMe2(-C9H6)}Ru(CO)  (-2-Me(CH2CHCH2)] (**10**)  Yellow  C, 50.7 (51.3)  H, 3.9 (4.5) | 1Hic 500 MHz : 6.96 [1H, d, J(HH) 8 Hc or f]  6.64 [1H, d, J(HH) 8, Hc or f], 6.43 [1H, t, J(HH) 8, Hd or e]  6.41 [1H, t, J(HH) 8, Hd or e], 6.38 [1H, pseudo q, C5H4]  6.28 [1H, pseudo q, C5H4], 5.88 [5H, s, C5H5]  5.81 [1H, pseudo q, C5H4], 5.57 [1H, pseudo q, C5H4]  5.49 [1H, d, J(HH) 3, Ha], 4.92 [1H, d, J(HH) 3, Hb]  3.47 [1H, m, Hsyn (CH2)2CMe], 3.40 [1H, m, Hsyn (CH2)2CMe]  2.07 [3H, s, Me], 1.97 [3H, s, Me], 1.66 [3H, s, (CH2)2C*Me*]  -0.29 [1H, s, Hanti (CH2)2CMe], -0.31 [1H, s, Hanti (CH2)2CMe]  13C{1H)*c* 125.7 MHz: 204.3 [br s, CO]  139.7 [s, Cipso], 124.8 [s, Cd or e], 124.6 [s, Cc or f]  124.5 [s, Cd or e], 124.3 [s, Cc or f], 117.4 [s, C5H4]  116.9 [s, C5H4], 115.9 [s, C5H5], 113.8 [s, C5H4]  112.0 [s, Cg, h or i], 110.9 [s, C5H4], 110.5 [s, Cg, h or i]  106.3 [s, Cg, h or i], 86.4 [s, Ca], 64.8 [s, Cb]  49.8 [s, (*C*H2)2CMe], 49.1 [s, (*C*H2)2CMe]  37.7 [s, *C*Me2 or (CH2)2*C*Me], 37.4 [s, *C*Me2 or (CH2)2*C*Me]  31.3 [s, Me], 31.1 [s, Me], 24.6 [s, (CH2)2C*Me*]  Selected IR data: (CsI disc) (CO) 1912 (s) | |
| [Zr{(-C5H5)ZrCl2(-C5H4)  CMe2(-C9H6)}2Fe][0.5toluene] (**11**)  Red-brown  C, 57.3 (57.0)  H, 4.7 (4.7)  Cl, 14.2 (14.3) | 1H*c* 500 MHz: 7.13 [1H, Hc or f]  6.86 [1H, Hd or e], 6.81 [1H, Hc or f], 6.53 [1H, C5H4]  6.44 [1H, Hd or e], 6.37 [1H, C5H4], 6.23 [1H, C5H4]  6.11 [5H, C5H5], 6.09 [1H, C5H4], 4.84 [1H, Ha or b]  4.16 [1H, Ha or b], 2.33 [3H, s, Me], 2.11 [3H, s, Me]  13C{1H}*c* 125.7 MHz: 142.6 [s, Cipso]  127.2 [s, Cc or f], 124.4 [s, Cd or e], 122.8 [s, Cc or f]  122.6 [s, Cd or e], 119.1 [s, Cg, h or i], 116.9 [s, C5H4]  116.4 [s, C5H5], 116.2 [s, C5H4], 115.7 [s, C5H4]  113.1 [s, Cg, h or i], 111.7 [s, C5H4], 62.6 [s, Ca or b]  69.7 [s, Ca or b], 37.5 [s, *C*Me2], 30.8 [s, Me]  30.0 [s, Me] | |
| [Zr(-C5H5)Cl2{-(-C5H4)CMe2(-C9H6)}Co(CO)(-C5Me5)] (**12**)  Black  C, 59.9 (59.9)  H, 5.6 (5.7)  Cl, 10.4 (11.1) | ESR Data: (Toluene solution, room temperature) 2.131 [g], 1.915 [g||] | |
| [Zr(-C5H5)Cl2{-(-C5H4)C(CH2)5(-C9H6)}ZrCl2(-C5H5)] (**13**)  Yellow  C, 50.2 (50.4)  H, 4.2 (4.2)  Cl, 20.0 (19.8) | 1H*d* 500 MHz: 7.90 [1 H, d, J(HH) 8, Hc or f]  7.56 [1 H, d, J(HH) 8,Hc or f], 7.31 [1 H, t, J(HH) 8, Hd or e]  7.19 [1 H, t, J(HH) 8, Hd or e], 7.04 [1 H, d, J(HH) 3, Ha]  6.87 [1 H, pseudo q, J(HH) 3, C5H4], 6.77 [1H, d, J(HH) 3, Hb]  6.71 [1 H, pseudo q, J(HH) 3, C5H4]  6.50 [1 H, pseudo q, J(HH) 3, C5H4]  6.36 [5 H, s, Cp (ZrCp)], 6.35 [1 H, pseudo q, J(HH) 3, C5H4]  5.87 [5 H, s, Cp (ZrInd)], 2.94 [1 H, m, cyclohexyl]  2.71 [2 H, m, cyclohexyl], 2.35 [1 H, m, cyclohexyl]  1.78 [1 H, m, cyclohexyl], 1.68 [1 H, m, cyclohexyl]  1.47 [2 H, m, cyclohexyl], 1.40 [1 H,m, cyclohexyl]  0.84 [1 H, m, cyclohexyl]  13C{1H}*d*125.7 MHz,: 143.8 [s, Cipso C5H4]  127.1 [s, Cg, h or i], 126.9 [s, Cc or f], 126.4 [s, Cd or e]  126.0 [s, Cc or f], 125.7 [s, Ca], 124.9 [s, Cd or e]  123.9 [s, Cg,h or i], 117.7 [s, Cp (ZrInd') and C5H4]  117.3 [s, C5H4], 116.7 [s, Cp (ZrCp')], 116.2 [s, C5H4]  112.0 [s, C5H4], 103.3 [s, Cb], 95.3 [s, Cg,h or i]  42.9 [s, C(CH2)5], 36.6 [s, cyclohexyl], 35.8 [s, cyclohexyl]  25.5 [s, cyclohexyl], 23.7 [s, cyclohexyl], 22.7 [s, cyclohexyl] | |
| [Hf(-C5H5)Cl2{-(-C5H4)C(CH2)5(-C9H6)}HfCl2(-C5H5)] (**14**)  Off-white  C, 39.9 (40.5)  H, 3.5 (3.4)  Cl, 15.5 (16.0) | 1H*d* 500 MHz: 7.92 [1 H, d, J(HH) 8, Hc or f]  7.56 [1 H, d, J(HH) 8,Hc or f], 7.30 [1 H, t, J(HH) 8, Hd or e]  7.17 [1 H, t, J(HH) 8, Hd or e], 7.04 [1 H, d, J(HH) 3, Ha]  6.74 [1 H, pseudo q, J(HH) 3, C5H4], .63 [1 H, pseudo q, J(HH) 3, C5H4]  6.61 [1H, d, J(HH) 3, Hb], 6.41 [1 H, pseudo q, J(HH) 3, C5H4]  6.28 [1 H, pseudo q, J(HH) 3, C5H4], 6.25 [5 H, s, Cp (HfCp')]  5.70 [5 H, s, Cp (HfInd')], 2.93 [1 H, m, cyclohexyl]  2.69 [2 H, m, cyclohexyl], 2.34 [1 H, m, cyclohexyl]  1.77 [1 H, m, cyclohexyl ], 1.66 [1 H, m, cyclohexyl]  1.45 [2 H, m, cyclohexyl], 1.41 [1 H,m, cyclohexyl]  0.79 [1 H, m, cyclohexyl]  13C{1H}*d*  125.7 MHz: 143.8 [s, Cipso C5H4]  131.6 [s, Cg, h or i], 127.1 [s, Cc or f]  126.5 [s, Cd or e], 125.9 [s, Cc or f]  125.6 [s, Ca], 124.7 [s, Cd or e], 124.3 [s, Cg, h or i]  124.2 [s, Cg, h or i], 116.3 [s, Cp (HfInd')]  115.8 [s, Cp (HfCp')], 115.4 [s, C5H4]  115.0 [s, C5H4], 114.6 [s, C5H4]  110.8 [s, C5H4], 102.2 [s, Cb]  42.8 [s, C(CH2)5], 36.4 [s, cyclohexyl]  35.7 [s, cyclohexyl], 25.4 [s, cyclohexyl]  23.7 [s, cyclohexyl], 22.8 [s, cyclohexyl] | |
| [Hf(-C5H5)Cl{(-C5H4)  C(CH2)5(1-C9H6)}] (**15**)  White | 1H*d* 500 MHz: 7.68 [1 H, d, J(HH) 8, Hc or f]  7.39 [1 H, d, J(HH) 8,Hc or f], 7.23 [1 H, t, J(HH) 8, Hd or e]  7.14 [1 H, t, J(HH) 8, Hd or e], 6.43 [1 H, pseudo q, J(HH) 3, C5H4]  6.27 [5 H, s, Cp], 6.20 [1 H, pseudo q, J(HH) 3, C5H4]  6.08 [1 H, pseudo q, J(HH) 3, C5H4]  5.72 [1 H, pseudo q, J(HH) 3, C5H4]  3.62 [1H, d, J(HH) 25, CH2], 3.32 [1H, d, J(HH) 25, CH2]  2.52 [1 H, br t, cyclohexyl], 2.38 [1 H, br t, cyclohexyl]  2.25 [1 H, br d, cyclohexyl], 1.96 [1 H, br d, cyclohexyl]  1.67 [3 H, m, cyclohexyl], 1.42 [3 H, m, cyclohexyl] | |
| [Zr(-C5H5)Cl2{-(-C5H4)C(CH2)5(-C9H6)}HfCl2(-C5H5)] (**16**)  Off-white  C, 43.2 (44.9)  H, 4.1 (3.8)  Cl, 17.7 (17.7) | 1H*d*  500 MHz: 7.89 [1 H, d, J(HH) 8, Hc or f]  7.56 [1 H, d, J(HH) 8,Hc or f], 7.29 [1 H, t, J(HH) 8, Hd or e]  7.17 [1 H, t, J(HH) 8, Hd or e], 7.03 [1 H, d, J(HH) 3, Ha]  6.84 [1 H, pseudo q, J(HH) 3, C5H4]  6.71 [1 H, pseudo q, J(HH) 3, C5H4]  6.60 [1H, d, J(HH) 3, Hb], 6.51 [1 H, pseudo q, J(HH) 3, C5H4]  6.38 [1 H, pseudo q, J(HH) 3, C5H4]  6.36 [5 H, s, Cp (ZrCp)], 5.71 [5 H, s, Cp (HfInd)]  2.91 [1 H, m, cyclohexyl], 2.70 [2 H, m, cyclohexyl]  2.34 [1 H, m, cyclohexyl], 1.87 [1 H, m, cyclohexyl]  1.78 [1 H, m, cyclohexyl], 1.66 [1H, m, cyclohexyl]  1.45 [1 H, m, cyclohexyl], 1.42 [1 H,m, cyclohexyl]  0.79 [1 H, m, cyclohexyl]  13C{1H}*d* 125.7 MHz: 141.5 [s, Cipso C5H4]  127.1 [s, Cc or f], 126.5 [s, Cd or e], 125.9 [s, Cc or f]  125.6 [s, Ca], 124.7 [s, Cd or e], 117.1 [s, C5H4]  116.8 [s, Cp (ZrCp')], 116.3 [s, Cp (HfInd')]  116.0 [s, 2 C5H4], 112.0 [s, C5H4]  102.0 [s, Cb], 42.9 [s, C(CH2)5], 36.5 [s, cyclohexyl]  35.7 [s, cyclohexyl], 25.4 [s, cyclohexyl]  23.7 [s, cyclohexyl], 22.6 [s, cyclohexyl] | |
| [Zr(-C5H5)Cl2{-(-C5H4)  (4-But-cyclohexyl)C(-C9H6)}  ZrCl2(-C5H5)] (**17**)  Yellow  C, 53.6 (53.0)  H, 5.2 (5.0)  Cl, 18.3 (18.4) | 1H*d*  500 MHz: 8.22 [1 H, d, J(HH) 8, Hc or f]  7.65 [1 H, d, J(HH) 8,Hc or f], 7.36 [1 H, t, J(HH) 8, Hd or e]  7.31 [1 H, t, J(HH) 8, Hd or e], 7.02 [1 H, d, J(HH) 3, Ha]  6.70 [1 H, pseudo q, J(HH) 3, C5H4], 6.61 [1H, d, J(HH) 3, Hb]  6.52 [1 H, pseudo q, J(HH) 3, C5H4], 6.35 [1 H, pseudo q, J(HH) 3, C5H4]  6.27 [5 H, s, Cp (ZrCp)], 6.09 [1 H, pseudo q, J(HH) 3, C5H4]  5.87 [5 H, s, Cp (HfInd)], 3.02 [2 H, m, cyclohexyl]  2.96 [1 H, dq, cyclohexyl], 2.52 [1 H, td, cyclohexyl]  1.82 [1 H, m, cyclohexyl], 1.77 [1 H, m, cyclohexyl]  1.38 [1H, qd, cyclohexyl], 1.20 [1 H, tt, C*H*But]  1.05 [1 H,td, cyclohexyl], 0.86 [9 H, s, But]  13C{1H}*d* 125.7 MHz: 143.8 [s, Cipso C5H4]  127.1 [s, Cc or f], 126.5 [s, Cd or e], 125.9 [s, Cc or f]  125.6 [s, Ca], 124.7 [s, Cd or e], 115.4 [s, C5H4]  115.0 [s, C5H4], 116.3 [s, Cp (HfInd)], 115.8 [s, Cp (HfCp)]  114.6 [s, C5H4], 110.8 [s, C5H4], 102.2 [s, Cb]  42.9 [s, C(CH2)5], 36.4 [s, cyclohexyl], 35.7 [s, cyclohexyl]  25.4 [s, cyclohexyl], 23.7 [s, cyclohexyl], 22.8 [s, cyclohexyl] | |
| [(-C5H5)HfCl{-(-C5H4)  CMe2(-C9H6)}(-H)2ZrCl  (-C5H5)], (**18**)  Off-white  C, 46.7 (46.8)  H, 4.4 (4.1) | 1H*c*: 7.91 [1 H, d, J(HH) 9, Hc or f]  7.18 [1 H, d, J(HH) 9, Hd or e], 7.04 [1 H, t, J(HH) 9,Hd or e]  6.99 [1 H, t, J(HH) 9, Hc or f], 6.33 [1 H, pseudo q, J(HH) 3, C5H4]  6.05 [1 H, pseudo q, J(HH) 3, C5H4], 5.93 [1 H, d, J(HH) 2.5, Ha]  5.84 [5 H, s, Cp ], 5.72 [5 H, s, Cp ], 5.58 [1 H, pseudo q,  J(HH) 3, C5H4], 5.33 [1H, d, J(HH) 3, Hb]  4.75 [1 H, pseudo q, J(HH) 3, C5H4]  2.64 [1H, d, J(HH) 10, -H], 2.20 [1H, d, J(HH) 10, -H]  1.67 [3H, s, Me], 1.62 [3H, s, Me]  13C{1H}*c* 125.7 MHz: 143.8 [s, Cipso C5H4]  126.4 [s, Cd or e], 125.6 [s, Cc or f], 125.1 [s, Cc or f]  125.0 [s, Cd or e], 117.8 [s, C5H4], 110.6 [s, Cp]  109.5 [s, Cp], 108.0 [s, Ca], 103.7 [s, C5H4]  101.5 [s, C5H4], 101.0 [s, C5H4], 94.3 [s, Cb]  38.8 [s, *C*Me2], 32.6 [s, C*Me*2], 31.7 [s, C*Me*2]  Selected IR Data (KBr): 1490 (br, m) | |
| [(-C5H5)HfCl{-(-C5H4)CMe2  (-C9H6)}(-O)ZrCl(-C5H5)] (**19**)  White  C, 46.3 (45.9)  H, 3.6 (3.7)  Cl, 8.7 (10.0) | 1H*d*: 8.08 [1 H, d, J(HH) 9, Hc or f]  7.91 [1 H, d, J(HH) 9, Hc or f], 7.90 [1 H, d, J(HH) 9, Hc or f]  7.70 [1 H, d, J(HH) 9, Hc or f], 7.34 [1 H, t, J(HH) 9, Hd or e]  7.29 [1 H, m, Hd or e], 7.28 [1 H, m, Hd or e]  7.15 [1 H, d, J(HH) 9,Hd or e] 6.77 [1 H, d, J(HH) 2.5, Ha]  6.75 [1 H, pseudo q, C5H4], 6.56 [1 H, d, J(HH) 2.5, Ha]  6.54 [1 H, pseudo q, C5H4], 6.45 [1 H, pseudo q, C5H4]  6.41 [1 H, pseudo q, C5H4], 6.39 [1 H, pseudo q, C5H4]  6.33 [1H, d, J(HH) 3, Hb], 6.31 [5 H, s, Cp ]  6.26 [5 H, s, Cp ], 6.22 [1 H, m, C5H4]  6.21 [1H, m, Hb], 6.18 [5 H, s, Cp ]  5.93 [1 H, m, C5H4], 5.92 [1 H, m, C5H4]  5.64 [5 H, s, Cp ], 1.81 [3H, s, Me]  1.80 [3H, s, Me], 1.62 [3H, s, Me]  1.58 [3H, s, Me]  13C{1H}*d* 125.7 MHz:126.3 [s, Cc or f]  126.2 [s, Cc or f], 124.5 [s, 2x Cc or f], 125.2 [s, Cd or e]  125.1 [s, Cd or e], 124.9 [s, 2x Cd or e], 122.7 [s, Ca]  122.2 [s, Ca], 117.6 [s, C5H4], 116.4 [s, Cp]  113.6 [s, Cp], 113.2 [s, Cp], 113.1 [s, Cp]  113.1 [s, C5H4], 110.9 [s, C5H4], 109.7 [s, C5H4]  108.0 [s, C5H4], 106.5 [s, C5H4], 106.4 [s, C5H4]  104.0 [s, C5H4], 98.9 [s, Cb], 95.3 [s, Cb]  32.9 [s, 2x CMe2], 31.8 [s, CMe2], 30.6 [s, CMe2]  Selected IR Data: (M-O-M) 768 (s), 748 (s); bridging ligand 808 (s) | |
| [Zr{Me2(-C5H4)2}(-C5H4Me)  Cl] (**20**)  Pale yellow  C, 60.6 (60.7)  H, 5.8 (5.6)  Cl, 9.85 (9.4) | 1H*c* , 500 MHz: 6.08 [2 H, pseudo q, J(HH) 3, C5H4 (*ansa*)], 5.72 [2 H, pseudo q, J(HH) 3, C5H4 (*ansa*)]  5.67 [2 H, pseudo t, J(HH) 3, C5*H*4Me],  5.37 [2 H, pseudo q, J(HH) 3, C5H4 (*ansa*)],  5.27 [2 H, pseudo q, J(HH) 3, C5H4 (*ansa*)], 5.04 [2 H, pseudo t, J(HH) 3, C5*H*4Me],2.11 [3 H, s, C5H4*Me*], 1.65 [3 H, s, CH3], 1.55 [3 H, s, CH3]  13C{1H}*d*: 145.7 [s, Cipso(C5H4)], 122.3 [s, C5H4 (*ansa*)], 115.9 [s, C5H4Me], 112.6 [s, C5H4 (*ansa*)], 112.1 [s, C5H4Me], 109.1 [s, C5H4 (*ansa*)], 93.0 [s, C5H4 (*ansa*)], 35.5 [s, *C*Me2], 24.2 [s, C*Me*2]  15.9 [s, C5H4*Me*] | |
| [Zr{(vC5H4)(4-But-cyclohexyl)(C9H6)}  Zr(-C5H5)Cl][0.5 C7H8] (**21**)  Red  C, 70.8 (70.4)  H, 6.9 (6.7)  Cl, 6.2 (6.4) | 1H*c* 500 MHz: 7.46 [3 H, m, Hb and c and f],  7.13 [1 H, t, J(HH) 8, Hd or e], 6.93 [1 H, t, J(HH) 8, Hd or e], 6.41 [1 H, d, J(HH) 4, Ha], 5.85 [1 H, pseudo q, J(HH) 3, C5H4], 5.79 [1 H, pseudo q, J(HH) 3, C5H4]. 5.36 [1 H, pseudo q, J(HH) 3, C5H4], 5.15 [5 H, s, C5H5], 4.83 [1 H, pseudo q, J(HH) 3, C5H4], 2.50 [1 H, dq, cyclohexyl], 2.29 [1 H, dd, cyclohexyl], 2.25 [1 H, dq, cyclohexyl],1.80 [1 H, dt, cyclohexyl], 1.51 [1 H, td, cyclohexyl], 1.47 [1 H, td, cyclohexyl], 1.41 [1 H, td, cyclohexyl], 1.32 [1 H, qd, cyclohexyl], 1.00 [1 H, tt, C*H*But], 0.83 [9 H, s, But],  13C{1H}*c*: 141.7 [s, Cipso], 137.1 [s, Cg or h], 130.0 [s, Cb], 127.3 [s, Cg or h], 123.8 [s, Cd or e]  123.3 [s, Cc or f], 120.5 [s, C5H4], 120.4 [s, Cd or e], 119.9 [s, Cf], 114.0 [s, C5H5], 111.4 [s, C5H4]  111.0 [s, Ca], 107.5 [s, C5H4], 98.0 [s, C5H4], 84.5 [s, Ci], 8.1 [s, *C*HBut], 43.9 [s, Cbridgehead],  39.5 [s, cyclohexyl], 35.4 [s, cyclohexyl],  32.4 [s, *C*(CH3)3], 27.6 [s, C(*C*H3)3], 24.2 [s, cyclohexyl], 23.1 [s, cyclohexyl] | |
| *a* Analytical data gven as: found (required) %.  *b* 1H NMR data given for 300MHz unless otherwise stated. 13C NMR data at 72.5 MHz unless  otherwise stated. All data at room temperature. Data given as: chemical shift ( ppm) [relative intensity,  multiplicity J in Hz, assignment]. Cp indicates -C5H5.  *c* InC6H6.  *d* In CD2Cl2.  *e* In d8-THF. | |  |
